# Supplementary material for: Novel tributyl phosphate-based hydrophobic deep eutectic solvent: application in simultaneous liquid–liquid microextraction of parabens and their metabolite in surface water samples
Source: Royal Society of Chemistry journal article supplement (doi:10.1039/d2gc02097a), 2022-01-01
Supplement: d2gc02097a1.pdf [file d2gc02097a1.pdf]

## Supplementary Material

### Novel tributyl phosphate-based hydrophobic deep eutectic solvent: Application in simultaneous liquid-liquid microextraction of parabens and their metabolite in surface water samples

Jiangping Cao, Yuwen Liu, Faqiong Zhao\*

*College of Chemistry and Molecular Sciences, Wuhan University, Wuhan 430072, Hubei Province, PR China*

#### Table of contents:

1. **Fig. S1** DSC profiles of TBP-M DES with the molar ratio of 1: 2 (heating rate: 10 °C/min; atmosphere: N<sub>2</sub>).
2. **Fig. S2** The ideal solid-liquid phase diagram of TBP-M DES; the red line, the liquidus line of TBP; the black line, the liquidus line of M.
3. **Fig. S3** Effect of solution pH (A), DES volume (B), ionic strength (C) and aspiration-dispersion cycles (D) on the extraction efficiency of PBs and PHBA.
4. **Fig. S4** Matrix effects of target PBs and PHBA in six different surface water samples.
5. **Fig. S5** Chromatograms of partial hydrolysate and spiking of analytes and conventional pollutants in surface water sample after AALLME.
6. **Table S1** Physiochemical properties of target PBs and PHBA in the present study.
7. **Table S2** Microbial toxicity of DES-4 by the 2-fold dilution method.
8. **Table S3** Analytical parameters of the proposed method for the determination of PBs and PHBA.
9. **Table S4** Recoveries of spiked blank water sample and the spiked sample with coexistences.

---

\* Corresponding author. Email: fqzhao@whu.edu.cn (F. Zhao); Tel: +86 27 68756747

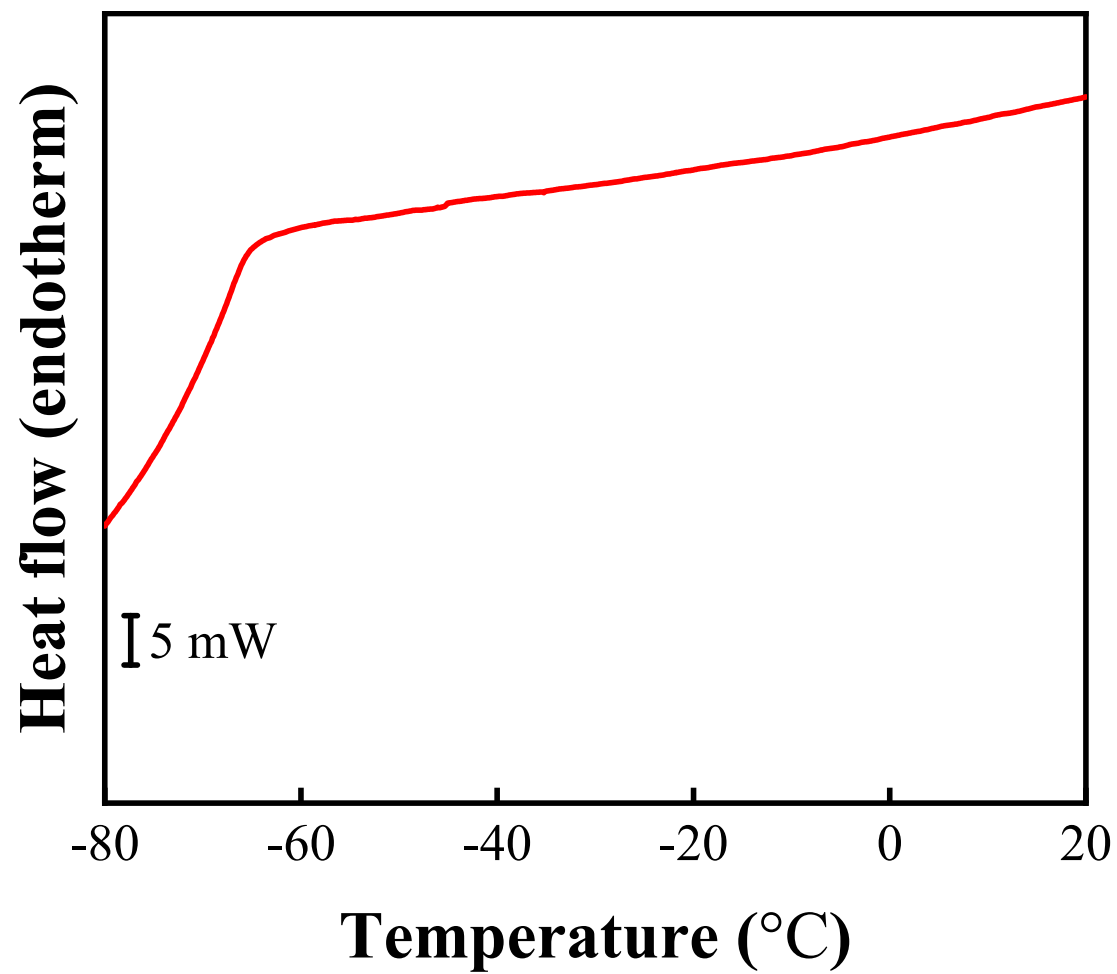

Fig. S1 DSC profiles of TBP-M DES with the molar ratio of 1: 2 (heating rate: 10 °C/min; atmosphere: N<sub>2</sub>).

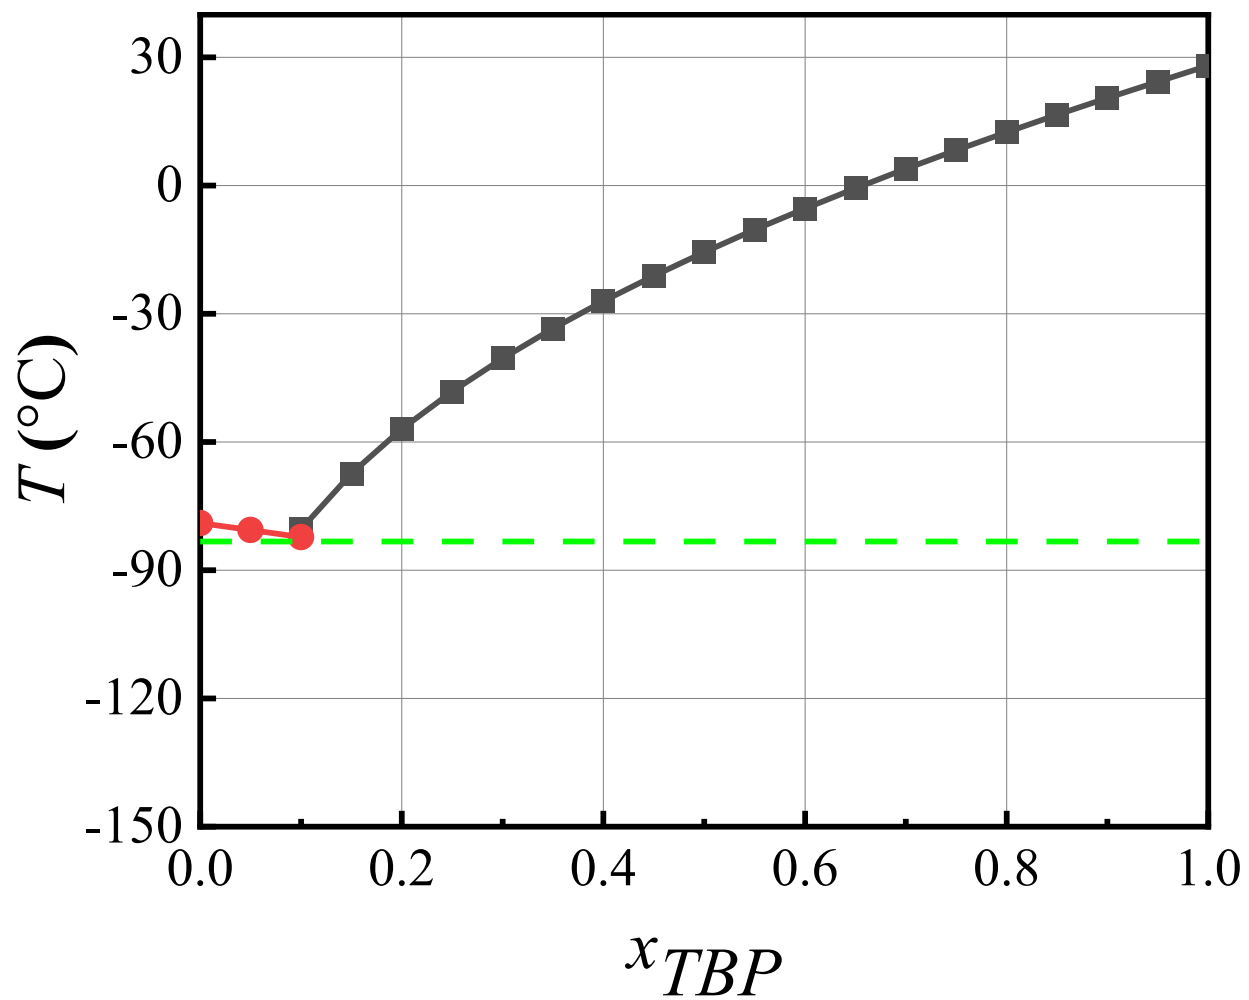

**Fig. S2** The ideal solid-liquid phase diagram of TBP-M DES; the red line, the liquidus line of TBP; the black line, the liquidus line of M.

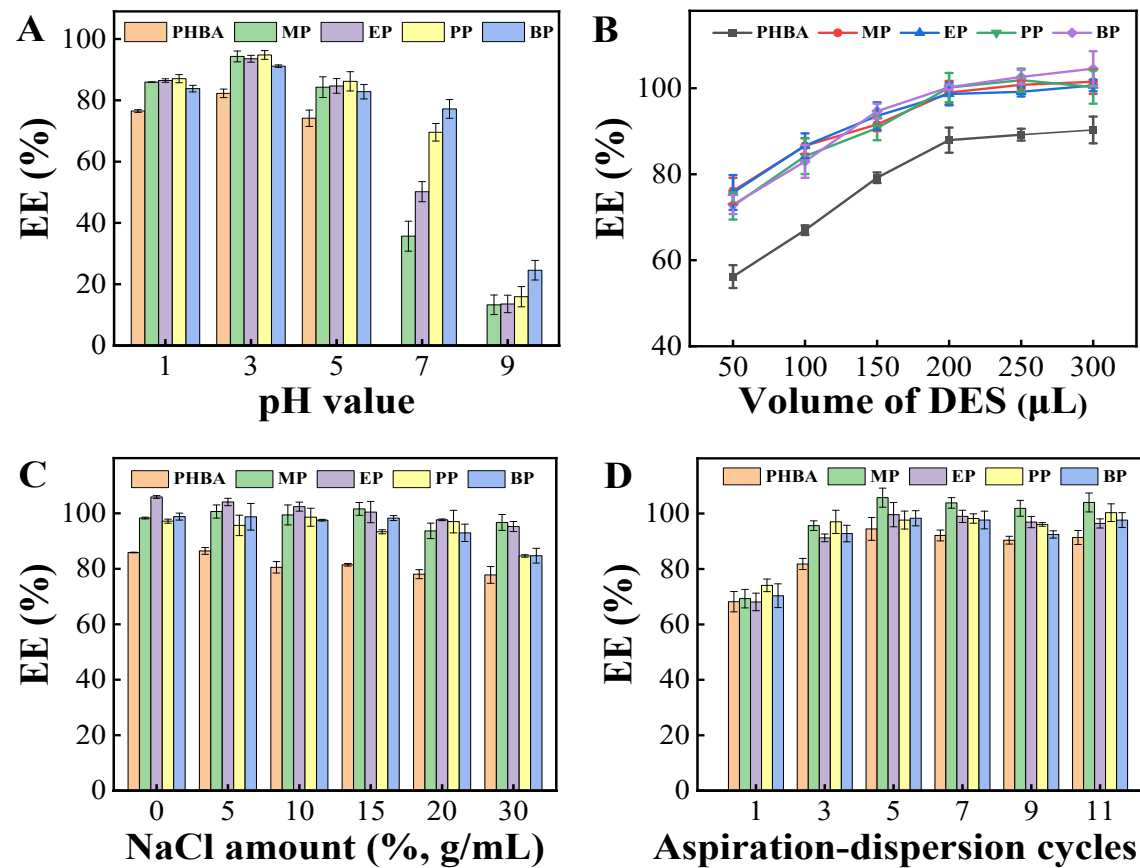

**Fig. S3** Effect of solution pH (A), DES volume (B), ionic strength (C) and aspiration-dispersion cycles (D) on the extraction efficiency of PBs and PHBA (n=3). Conditions: Sample, 5 mL of spiked water working solution (100  $\mu\text{g/L}$ ); extraction temperature, room temperature; centrifugation, 1 min at 5000 rpm, other varying extraction conditions were illustrated in the figures.

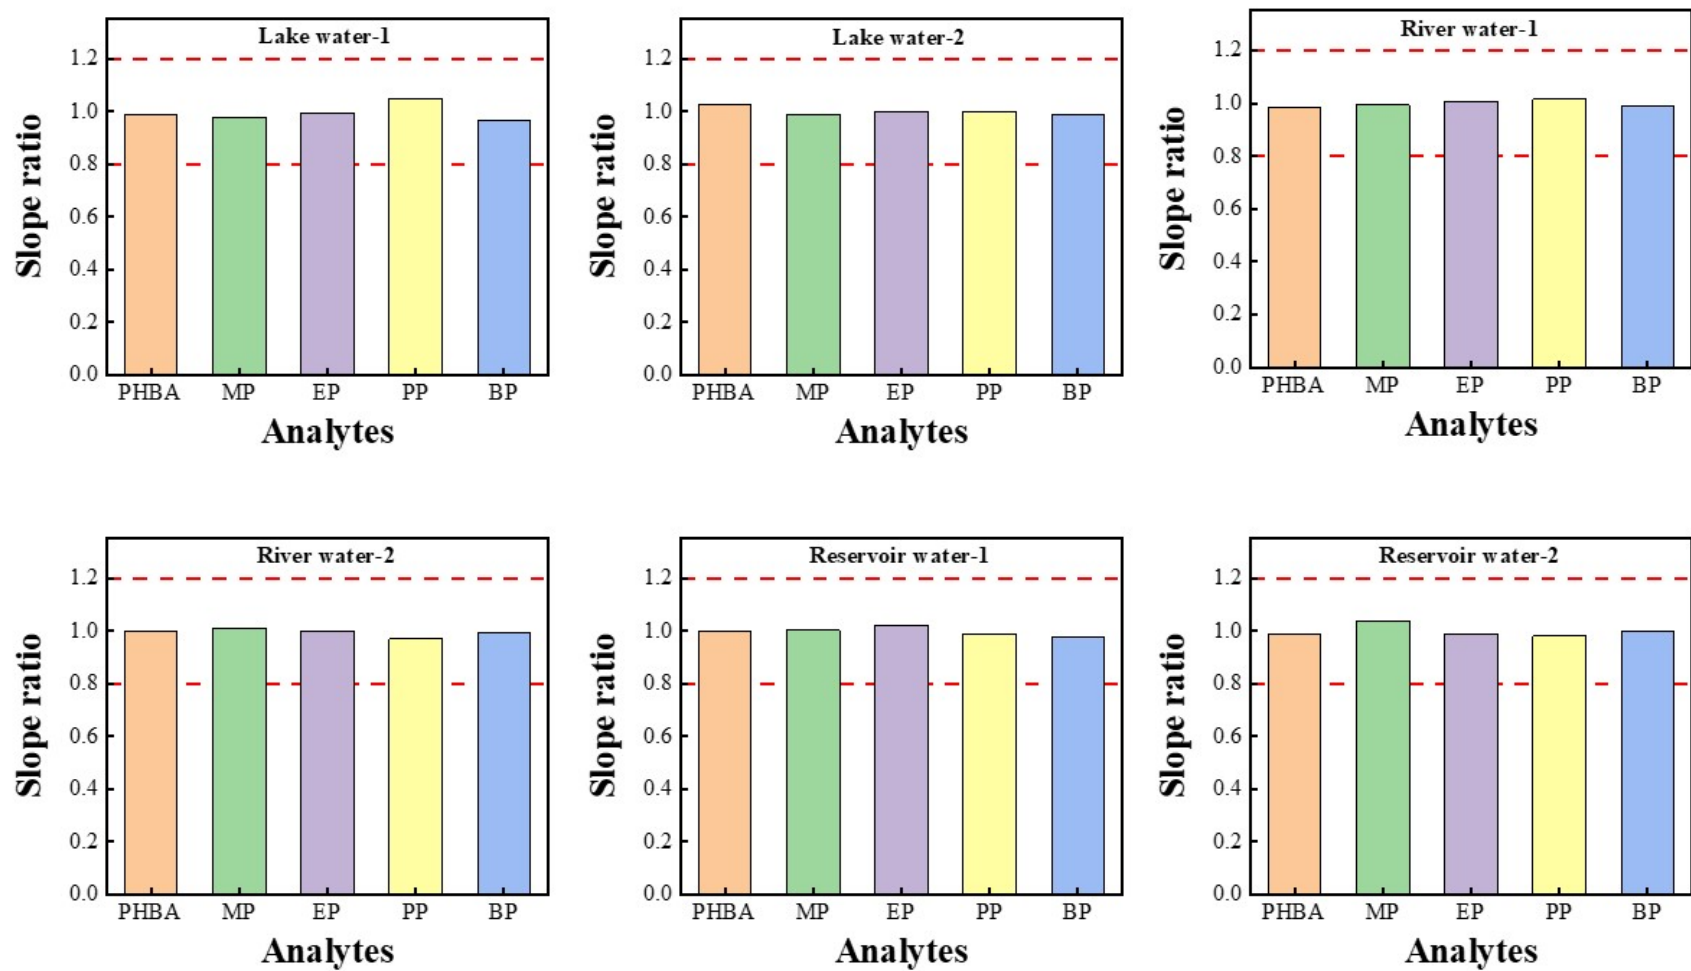

Fig. S4 Matrix effects of target PBs and PHBA in six different surface water samples.

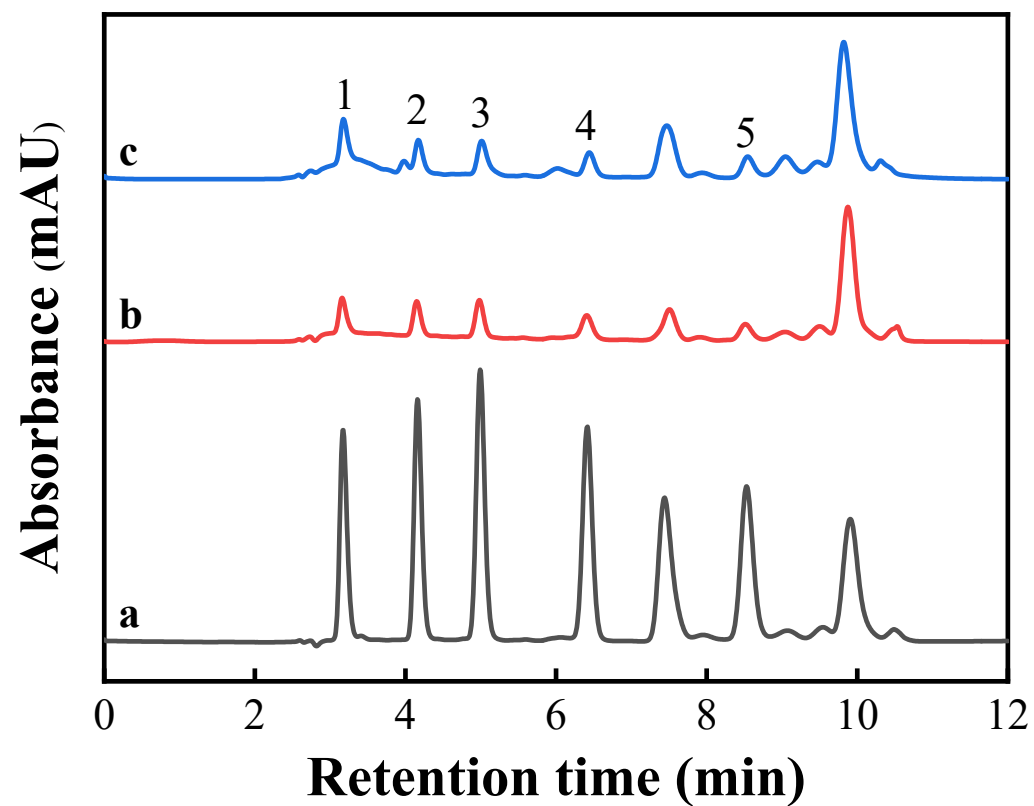

**Fig. S5** Chromatograms of partial hydrolysate from the mixture of four PBs (initial concentration for each PB: 500  $\mu\text{g/L}$ ) (a), spiked blank lake water (spiked level: 20  $\mu\text{g/L}$ ) (b), b + 200  $\mu\text{g/L}$  phenol, bisphenol A and naphthalene as model coexistences (c) after AALLME. Peak identification: 1, PHBA; 2, MP; 3, EP; 4, PP; 5, BP.

**Table S1** Physiochemical properties of target PBs and PHBA in the present study.

| Analyte               | Abbreviation | Chemical formula  | Structure                                                                            | CAS number | Molecular weight | $pK_a^*$        | $\log P^{**}$     |
|-----------------------|--------------|-------------------|--------------------------------------------------------------------------------------|------------|------------------|-----------------|-------------------|
| p-Hydroxybenzoic acid | PHBA         | $C_7H_6O_3$       | 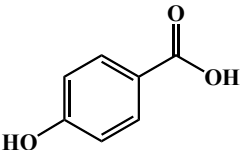   | 99-96-7    | 138.12           | $4.57 \pm 0.10$ | $1.401 \pm 0.221$ |
| Methylparaben         | MP           | $C_8H_8O_3$       |    | 99-76-3    | 152.15           | $8.31 \pm 0.13$ | $1.882 \pm 0.224$ |
| Ethylparaben          | EP           | $C_9H_{10}O_3$    |    | 120-47-8   | 166.17           | $8.31 \pm 0.13$ | $2.391 \pm 0.224$ |
| Propylparaben         | PP           | $C_{10}H_{12}O_3$ |    | 94-13-3    | 180.20           | $8.23 \pm 0.15$ | $2.901 \pm 0.224$ |
| Buthylparaben         | BP           | $C_{11}H_{14}O_3$ |  | 94-26-8    | 194.23           | $8.22 \pm 0.15$ | $3.410 \pm 0.224$ |

\*  $K_a$ : acid dissociation constant, \*\* P: octanol-water partitioning coefficient. The data were obtained from SciFinder scholar database (25 °C).

**Table S2** Microbial toxicity of DES-4 by the 2-fold dilution method.

| Compd            | G+ bacteria             | G- bacteria             |
|------------------|-------------------------|-------------------------|
|                  | <i>S.a</i> <sup>a</sup> | <i>E.c</i> <sup>b</sup> |
| TBP              | >128                    | >128                    |
| M                | >128                    | >128                    |
| DES-4            | >128                    | >128                    |
| VAN <sup>c</sup> | 1                       | --- <sup>d</sup>        |
| MEM <sup>e</sup> | ---                     | 0.0625                  |

<sup>a</sup>S.a: *Staphylococcus aureus*, <sup>b</sup>E.c: *Escherichia coli*, <sup>c</sup>VAN: *Vancomycin*, <sup>d</sup>---: no microbial toxicity, <sup>e</sup>MEM: *Meropenem*.



**Table S3** Analytical parameters of the proposed method for the determination of PBs and PHBA.

| Analyte | Linear range ( $\mu\text{g/L}$ ) | $R^2$  | LOD ( $\mu\text{g/L}$ ) | LOQ ( $\mu\text{g/L}$ ) | RSD (% , n=3) |           | Enrichment factor |
|---------|----------------------------------|--------|-------------------------|-------------------------|---------------|-----------|-------------------|
|         |                                  |        |                         |                         | Intra-day     | Inter-day |                   |
| PHBA    | 3-500                            | 0.9983 | 0.8                     | 2.4                     | 3.3           | 7.6       | 22.6              |
| MP      | 3-500                            | 0.9995 | 0.6                     | 2.1                     | 1.9           | 4.8       | 23.0              |
| EP      | 3-500                            | 0.9990 | 0.7                     | 2.2                     | 4.0           | 5.1       | 24.5              |
| PP      | 3-500                            | 0.9993 | 0.5                     | 1.8                     | 2.6           | 6.3       | 24.1              |
| BP      | 3-500                            | 0.9989 | 0.9                     | 2.9                     | 3.0           | 5.5       | 23.9              |

**Table S4** Recoveries of spiked blank water sample and the spiked sample with coexistences.

| Analyte | without coexistences |         | with coexistences |         |
|---------|----------------------|---------|-------------------|---------|
|         | Recoveries (%)       | RSD (%) | Recoveries (%)    | RSD (%) |
| PHBA    | 94.0                 | 2.8     | 93.3              | 0.7     |
| MP      | 97.4                 | 1.0     | 87.3              | 3.8     |
| EP      | 95.7                 | 3.2     | 96.5              | 1.6     |
| PP      | 102                  | 2.6     | 97.1              | 2.4     |
| BP      | 97.0                 | 4.5     | 93.9              | 3.0     |
